# Supplementary material for: Secondary Somatic Mutations in G-Protein-Related Pathways and Mutation Signatures in Uveal Melanoma
Source: MDPI journal article supplement (doi:10.3390/cancers11111688), 2019-10-30

Supplementary Materials:

# Secondary Somatic Mutations in G-Protein-Related Pathways and Mutation Signatures in Uveal Melanoma

Francesca Piaggio, Veronica Tozzo, Cinzia Bernardi, Michela Croce, Roberto Puzone, Silvia Viaggi, Serena Patrone, Annalisa Barla, Domenico Coviello, Martine J. Jager, Pieter A. van der Velden, Michael Zeschnigk, Davide Cangelosi, Alessandra Eva, Ulrich Pfeffer and Adriana Amaro

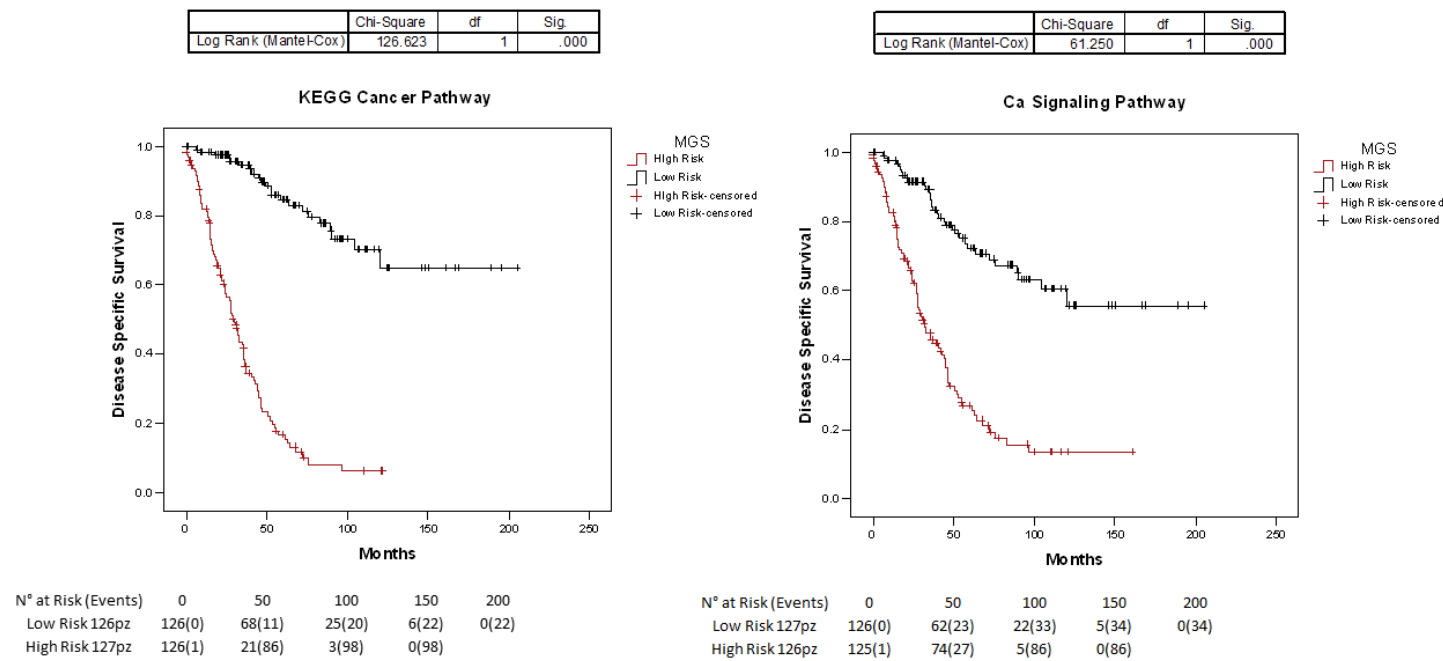

**Figure S1.** Kaplan–Meyer survival analysis using the genes carrying secondary mutations that are annotated as belonging to “KEGG Cancer Pathways” or “Calcium Signaling”.

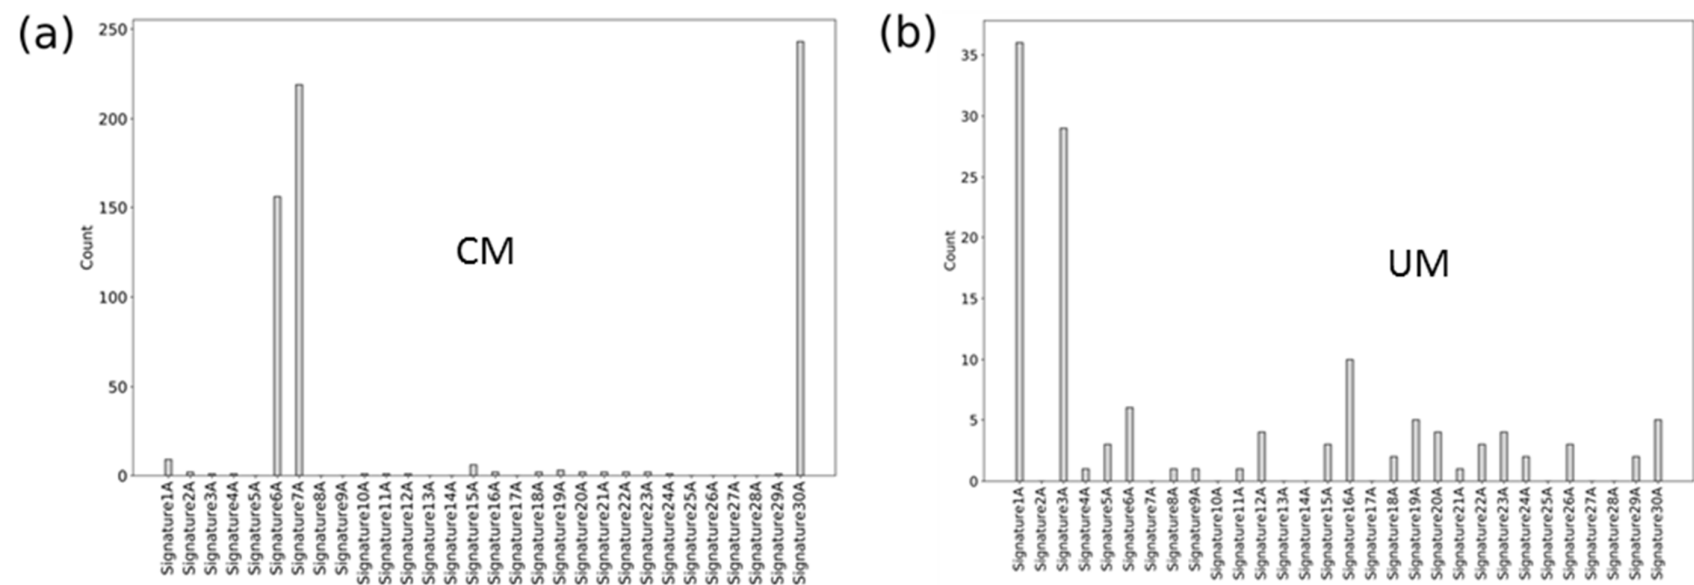

Figure S2. Frequency of Alexandrov’s signatures in cutaneous and uveal melanoma.

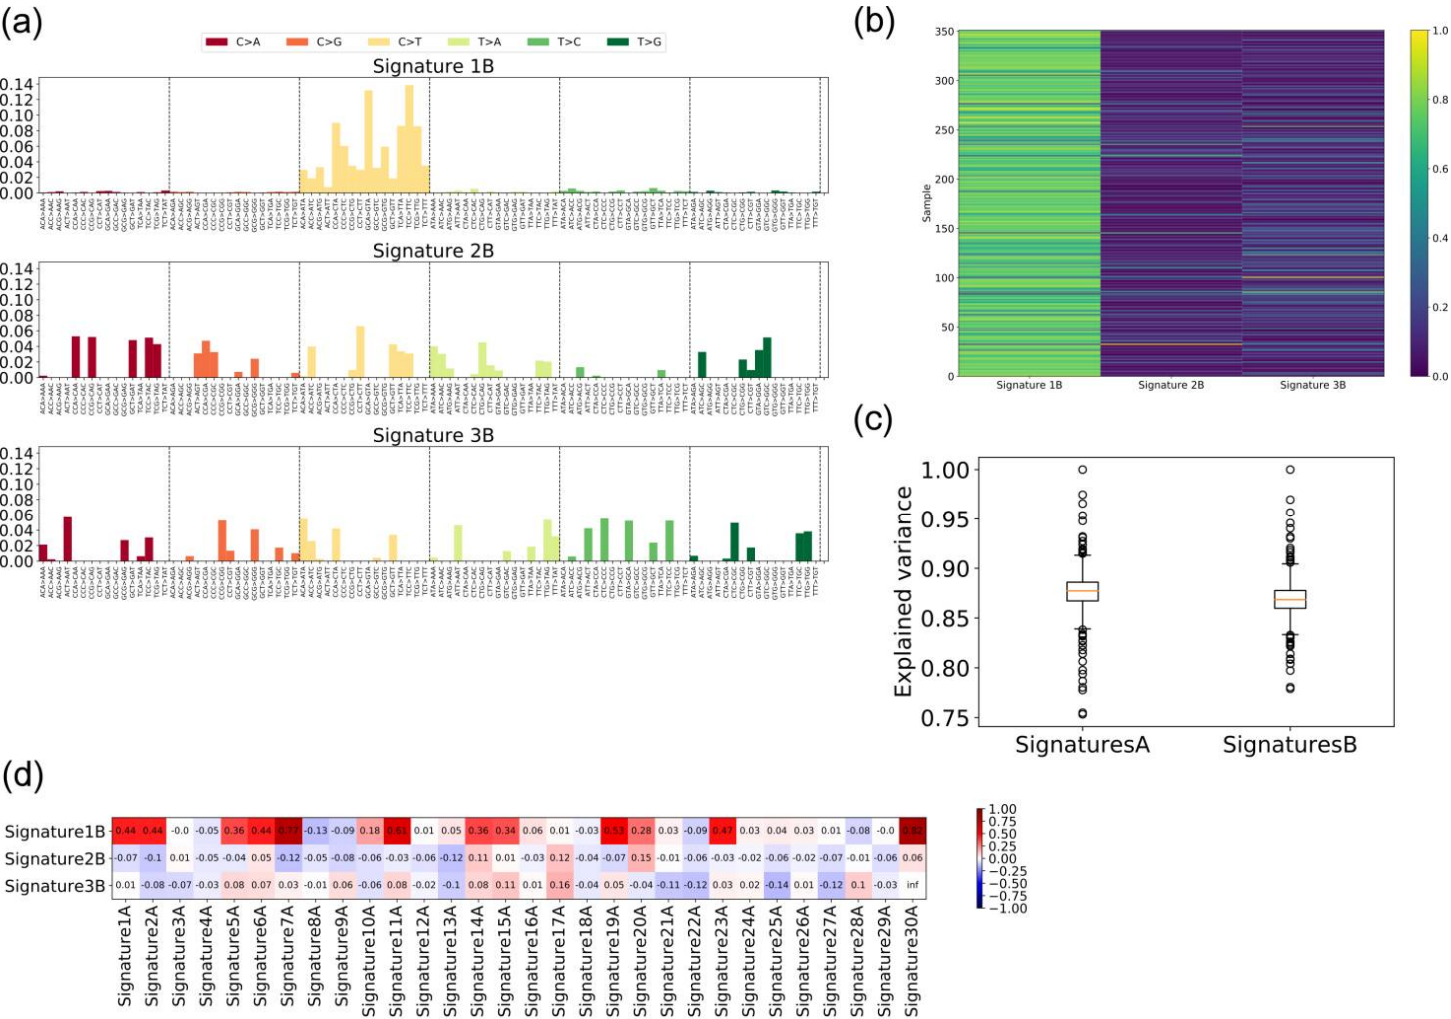

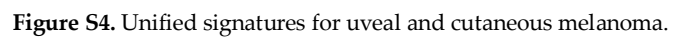

Supplement: s1 [file s1]
